# Supplementary material for: Integrative Morphological and Molecular Insights into Rhynchostegium celebicum (Brachytheciaceae), a moss from the Eastern Himalaya
Source: Research Square preprint supplement (doi:10.21203/rs.3.rs-8194045/v1), 2026-01-13

**Supplementary file**

**Integrative Morphological and Molecular Insights into *Rhynchostegium celebicum* (Brachytheciaceae), a moss from the Eastern Himalaya.**

Ritwika Bera1, Pritha De Paul2, Jayashree Dutta2 and Mousumi Poddar Sarkar2*

1 PG Department of Botany, Rajendra University, Balangir, Odisha -767002, India.; email: [ritwikabera12@gmail.com](mailto:ritwikabera12@gmail.com)

2 Semiochemicals and Lipid Laboratory, Department of Life Sciences, Presidency University, Kolkata -700073, West Bengal, India.

emails: [mousumipsarkar1@gmail.com](mailto:mousumipsarkar1@gmail.com), [prithadepaul2@gmail.com](mailto:prithadepaul2@gmail.com)

* Author for correspondence

**Supplementary Figure.** Habitat and morphological features of *Rhynchostegium celebicum.* **a**,*In situ* photograph showing growth form of moss *Rhynchostegium celebicum* on rock surface. **b**, Plant growth-form on a tree twig**c**, Full leaf. **d**, Leaf apex. **e**, Leaf margin. **f**, Leaf base showing rhomboidal cells.


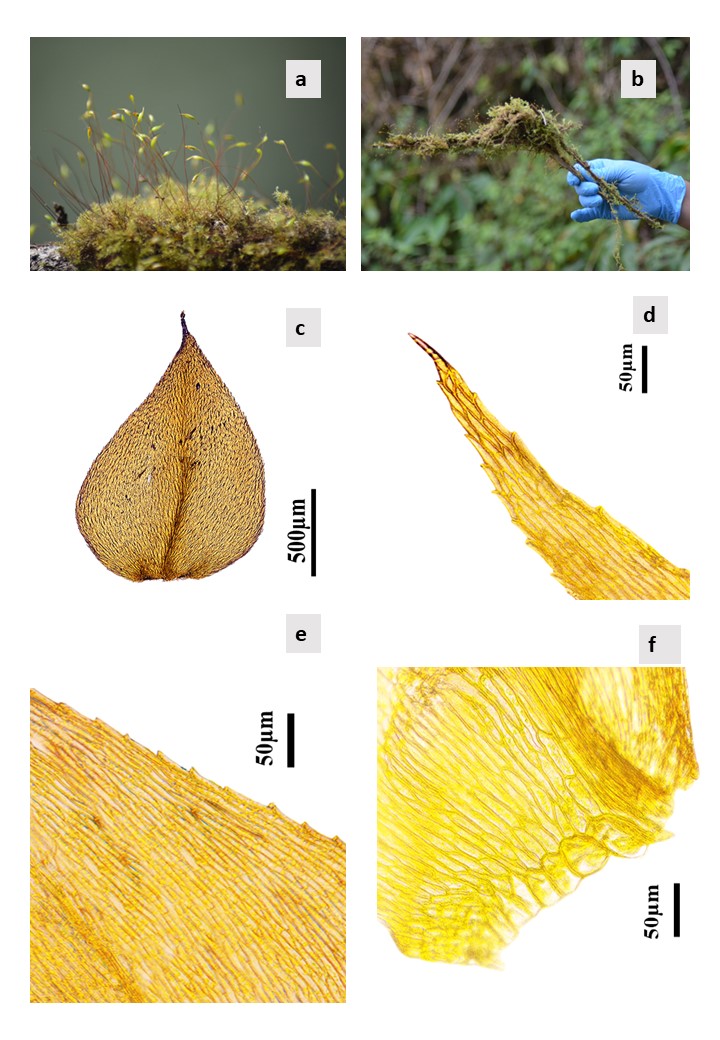

Supplement: Supplementary file 1 [file 59da1206a8da939fbfc6098c.docx]
